# Supplementary material for: Methoxyhispolon Methyl Ether, a Hispolon Analog, Thwarts the SRC/STAT3/BCL-2 Axis to Provoke Human Triple-Negative Breast Cancer Cell Apoptosis In Vitro
Source: MDPI journal article supplement (doi:10.3390/biomedicines11102742), 2023-10-10
Supplement: s1 [file s1]

# Methoxyhispolon Methyl Ether, A Hispolon Analog, Thwarts the SRC/STAT3/BCL-2 Axis to Provoke Human Triple-Negative Breast Cancer Cell Apoptosis In Vitro

## Supplementary Figures

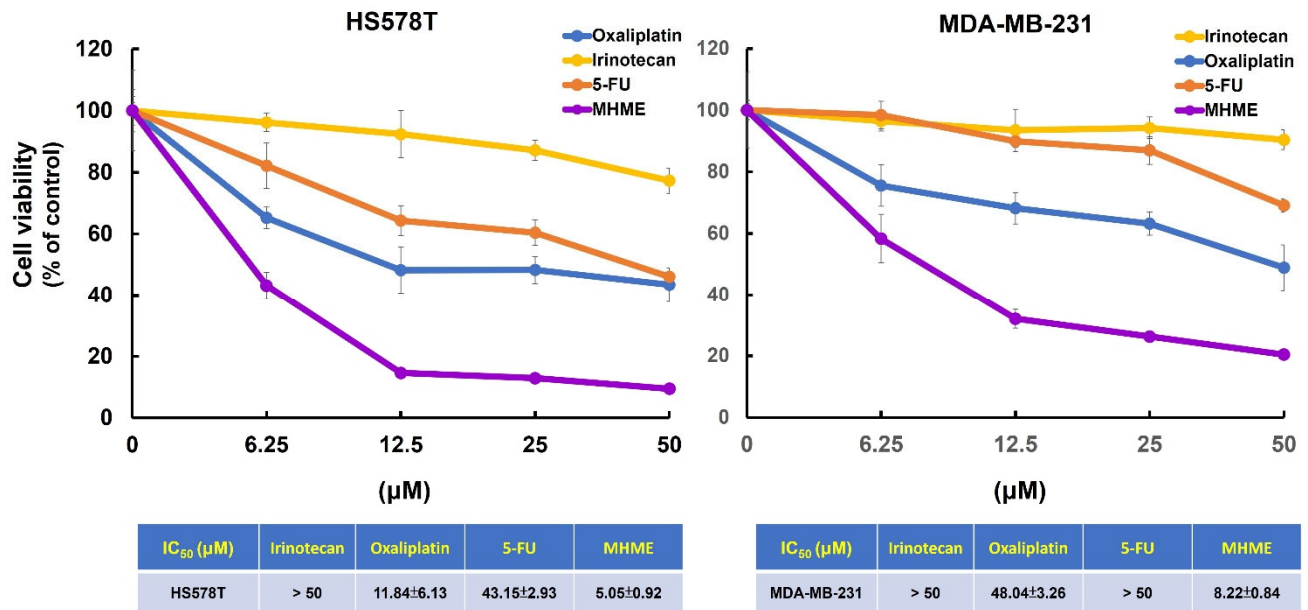

**Figure S1. Comparison of the *in vitro* TNBC cytotoxicity of MHME with standard chemotherapeutics.** Human TNBC cell lines HS578T and MDA-MB-231 were treated with graded dosages (0, 6.25, 25, 50 μM) of MHME or several common chemotherapeutics, such as 5-Fluorouracil (5-FU), Irinotecan, and Oxaliplatin. After 48 hours, the viability of drug-treated TNBC cells was determined using the CellTiter 96® AQueous One Solution Cell Proliferation Assay (MTS) assay (Promega; Madison, WI, USA) as described in the *Materials and Methods* section.
